# Supplementary material for: The effect of primary site, functional status and treatment modality on survival in gastroenteropancreatic neuroendocrine neoplasms with synchronous liver metastasis: a US population-based study
Source: PubMed Central journal article supplement — Ann Transl Med. 2021 Feb;9(4):329. doi: 10.21037/atm-20-5348 (PMC7944286; doi:10.21037/atm-20-5348), 2021-02
Supplement: atm-09-04-329-supplementary.pdf [file atm-09-04-329-supplementary.pdf]

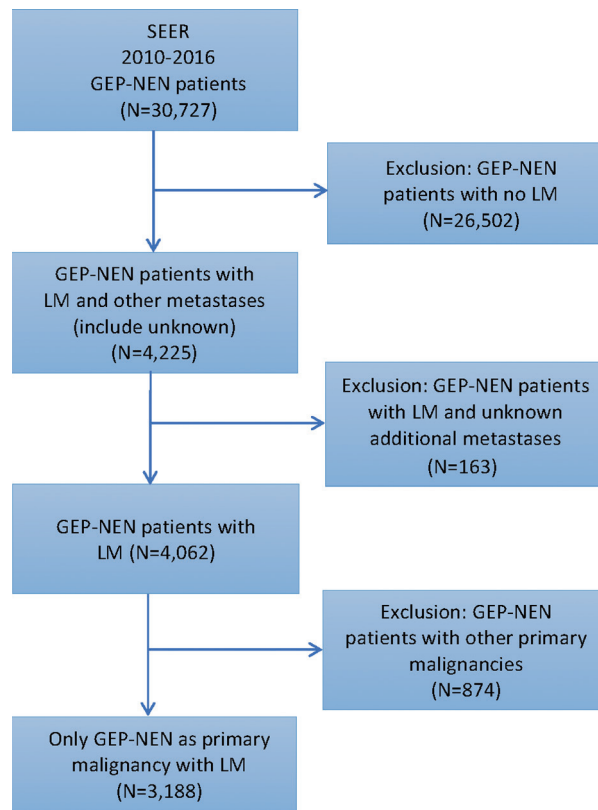

Figure S1 Flowchart of the inclusion and exclusion criteria.

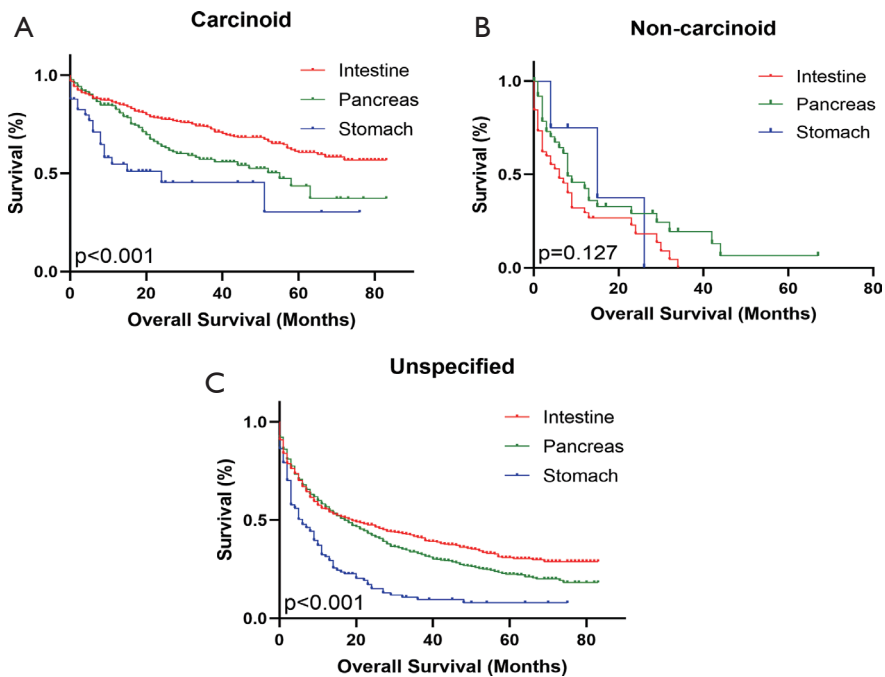

Figure S2 Kaplan-Meier survival curves depicting overall survival in patients with liver metastatic GEP-NENs according to tumor primary sites among different functional status: (A) carcinoid, (B) non-carcinoid, and (C) unspecified tumor type (includes both types). The p-values were determined by the log-rank test.

**Table S1** Demographic and disease factors in all primary GEP-NEN patients with liver metastasis (all origin locations) - univariate and multivariate Cox regression results

| Variables                        | Patients<br>(n=3188) | Cox regression analysis |                           |                         |                         |
|----------------------------------|----------------------|-------------------------|---------------------------|-------------------------|-------------------------|
|                                  |                      | Univariate<br>P value   | Unadjusted HR<br>(95% CI) | Multivariate<br>P value | Adjusted HR<br>(95% CI) |
| <b>Gender</b>                    |                      |                         |                           |                         |                         |
| Female                           | 1444                 | Reference               | 1.151 (1.043–1.269)       | Reference               | 1                       |
| Male                             | 1744                 | 0.005                   |                           | 0.042                   | 1.108 (1.004–1.223)     |
| <b>Age, years</b>                |                      |                         |                           |                         |                         |
| Average, range                   | 60.9 (4–97)          | <0.001                  | 1.031 (1.027–1.035)       | <0.001                  | 1.024 (1.020–1.028)     |
| <b>Tumor site</b>                |                      |                         |                           |                         |                         |
| Intestine                        | 1590                 | Reference               | 1                         | Reference               | 1                       |
| Pancreas                         | 1427                 | <0.001                  | 1.447 (1.308–1.602)       | 0.141                   | 0.919 (0.821–1.028)     |
| Stomach                          | 171                  | <0.001                  | 2.563 (2.119–3.102)       | 0.802                   | 1.026 (0.839–1.254)     |
| <b>Grade</b>                     |                      |                         |                           |                         |                         |
| well                             | 906                  | Reference               | 1                         | Reference               | 1                       |
| Moderate                         | 394                  | 0.011                   | 1.337 (1.069–1.673)       | 0.041                   | 1.264 (1.010–1.583)     |
| Poor or undifferentiated         | 621                  | <0.001                  | 7.625 (6.494–8.952)       | <0.001                  | 4.755 (3.977–5.686)     |
| Unknown                          | 1267                 | <0.001                  | 3.544 (3.052–4.115)       | <0.001                  | 2.163 (1.837–2.547)     |
| <b>Functional type</b>           |                      |                         |                           |                         |                         |
| Carcinoid tumor                  | 1125                 | Reference               | 1                         | Reference               | 1                       |
| Non-carcinoid tumor              | 88                   | <0.001                  | 4.611 (3.541–6.003)       | <0.001                  | 2.633 (2.006–3.456)     |
| Unspecified neuroendocrine tumor | 1975                 | <0.001                  | 2.703 (2.384–3.065)       | <0.001                  | 1.844 (1.613–2.108)     |
| <b>Surgery</b>                   |                      |                         |                           |                         |                         |
| No                               | 1959                 | Reference               | 1                         | Reference               | 1                       |
| Yes                              | 1204                 | <0.001                  | 0.290 (0.258–0.327)       | <0.001                  | 0.459 (0.398–0.530)     |
| Unknown                          | 25                   | 0.185                   | 0.709 (0.426–1.179)       | 0.921                   | 1.026 (0.616–1.711)     |
| <b>Radiotherapy</b>              |                      |                         |                           |                         |                         |
| No                               | 2975                 | Reference               | 1.357 (1.135–1.622)       | Reference               | 1                       |
| Yes                              | 213                  | 0.001                   |                           | 0.428                   | 1.078 (0.895–1.298)     |
| <b>Chemotherapy</b>              |                      |                         |                           |                         |                         |
| No                               | 1888                 | Reference               | 1.472 (1.335–1.623)       | Reference               | 1                       |
| Yes                              | 1300                 | <0.001                  |                           | <0.001                  | 0.820 (0.734–0.916)     |
| <b>Bone metastasis</b>           |                      |                         |                           |                         |                         |
| No                               | 2953                 | Reference               | 2.064 (1.758–2.422)       | Reference               | 1                       |
| Yes                              | 235                  | <0.001                  |                           | 0.007                   | 1.261 (1.067–1.491)     |
| <b>Brain metastasis</b>          |                      |                         |                           |                         |                         |
| No                               | 3163                 | Reference               | 3.183 (2.046–4.954)       | Reference               | 1                       |
| Yes                              | 25                   | <0.001                  |                           | 0.647                   | 0.897 (0.564–1.428)     |
| <b>Lung metastasis</b>           |                      |                         |                           |                         |                         |
| No                               | 2944                 | Reference               | 2.506 (2.147–2.926)       | Reference               | 1                       |
| Yes                              | 244                  | <0.001                  |                           | <0.001                  | 1.483 (1.260–1.745)     |

**Table S2** Demographic and disease factors in all primary iNEN patients with liver metastasis - univariate and multivariate Cox regression results

| Variables                        | Patients<br>(n=1590) | Overall survival      |                       |                         |                     |
|----------------------------------|----------------------|-----------------------|-----------------------|-------------------------|---------------------|
|                                  |                      | Univariate<br>P value | HR (95% CI)           | Multivariate<br>P value | HR (95% CI)         |
| <b>Gender</b>                    |                      |                       |                       |                         |                     |
| Female                           | 773                  | Reference             | 1                     |                         |                     |
| Male                             | 817                  | 0.086                 | 1.139 (0.982–1.321)   |                         |                     |
| <b>Age, years</b>                |                      |                       |                       |                         |                     |
| Average, range                   | 61.2, 14–95          | <0.001                | 1.035 (1.028–1.041)   | <0.001                  | 1.033 (1.027–1.040) |
| <b>Grade</b>                     |                      |                       |                       |                         |                     |
| Well                             | 597                  | Reference             |                       | Reference               | 1                   |
| Moderate                         | 212                  | 0.051                 | 1.386 (0.999–1.922)   | 0.095                   | 1.323 (0.953–1.838) |
| Poor or undifferentiated         | 347                  | <0.001                | 11.312 (9.049–14.141) | <0.001                  | 4.886 (3.737–6.388) |
| Unknown                          | 434                  | <0.001                | 3.663 (2.933–4.574)   | <0.001                  | 2.489 (1.955–3.169) |
| <b>Functional type</b>           |                      |                       |                       |                         |                     |
| Carcinoid tumor                  | 726                  | Reference             | 1                     | Reference               | 1                   |
| Non- carcinoid tumor             | 45                   | <0.001                | 6.246 (4.372–8.922)   | <0.001                  | 2.138 (1.461–3.128) |
| Unspecified neuroendocrine tumor | 819                  | <0.001                | 2.789 (2.350–3.309)   | <0.001                  | 1.722 (1.427–2.078) |
| <b>Site</b>                      |                      |                       |                       |                         |                     |
| Colorectum and anus              | 625                  | Reference             | 1                     | Reference               | 1                   |
| Appendix                         | 22                   | 0.008                 | 0.409 (0.211–0.791)   | 0.120                   | 0.586 (0.299–1.150) |
| Small intestine                  | 943                  | <0.001                | 0.201 (0.171–0.235)   | <0.001                  | 0.357 (0.294–0.434) |
| <b>Surgery</b>                   |                      |                       |                       |                         |                     |
| No                               | 633                  | Reference             | 1                     | Reference               | 1                   |
| Yes                              | 947                  | <0.001                | 0.307 (0.263–0.357)   | <0.001                  | 0.619 (0.519–0.738) |
| Unknown                          | 10                   | 1.000                 | 1.000 (0.497–2.014)   | 0.655                   | 1.174 (0.580–2.377) |
| <b>Radiotherapy</b>              |                      |                       |                       |                         |                     |
| No                               | 1492                 | Reference             | 1                     | Reference               | 1                   |
| Yes                              | 98                   | 0.002                 | 1.531 (1.170–2.003)   | 0.867                   | 1.024 (0.774–1.355) |
| <b>Chemotherapy</b>              |                      |                       |                       |                         |                     |
| No                               | 1117                 | Reference             | 1                     | Reference               | 1                   |
| Yes                              | 473                  | <0.001                | 1.908 (1.641–2.219)   | 0.004                   | 0.759 (0.630–0.915) |
| <b>Bone metastasis</b>           |                      |                       |                       |                         |                     |
| No                               | 1490                 | Reference             | 1                     | Reference               | 1                   |
| Yes                              | 100                  | <0.001                | 2.587 (2.023–3.308)   | 0.717                   | 0.953 (0.733–1.238) |
| <b>Brain metastasis</b>          |                      |                       |                       |                         |                     |
| No                               | 1579                 | Reference             | 1                     | Reference               | 1                   |
| Yes                              | 11                   | 0.001                 | 3.304 (1.643–6.644)   | 0.691                   | 1.160 (0.558–2.408) |
| <b>Lung metastasis</b>           |                      |                       |                       |                         |                     |
| No                               | 1477                 | Reference             | 1                     | Reference               | 1                   |
| Yes                              | 113                  | <0.001                | 2.604 (2.065–3.285)   | 0.052                   | 1.273 (0.998–1.624) |

**Table S3** Demographic and disease factors in all primary pNEN patients with liver metastasis - univariate and multivariate Cox regression results

| Variables                        | Patients<br>(n=1427) | Overall survival      |                     |                         |                     |
|----------------------------------|----------------------|-----------------------|---------------------|-------------------------|---------------------|
|                                  |                      | Univariate P<br>value | HR (95% CI)         | Multivariate<br>P value | HR (95% CI)         |
| Gender                           |                      |                       |                     |                         |                     |
| Female                           | 604                  | Reference             | 1                   |                         |                     |
| Male                             | 823                  | 0.243                 | 1.087 (0.945–1.251) |                         |                     |
| Age, years                       |                      |                       |                     |                         |                     |
| Average, range                   | 60.2 (4–97)          | <0.001                | 1.029 (1.023–1.035) | <0.001                  | 1.022 (1.016–1.028) |
| Grade                            |                      |                       |                     |                         |                     |
| Well                             | 282                  | Reference             |                     | Reference               | 1                   |
| Moderate                         | 166                  | 0.572                 | 1.099 (0.793–1.523) | 0.986                   | 0.997 (0.719–1.383) |
| Poor or undifferentiated         | 189                  | <0.001                | 3.881 (2.991–5.036) | <0.001                  | 2.630 (2.010–3.441) |
| Unknown                          | 790                  | <0.001                | 2.694 (2.163–3.355) | <0.001                  | 1.631 (1.297–2.051) |
| Functional type                  |                      |                       |                     |                         |                     |
| Carcinoid tumor                  | 358                  | Reference             | 1                   | Reference               | 1                   |
| Non- carcinoid tumor             | 38                   | <0.001                | 3.134 (2.064–4.760) | <0.001                  | 2.608 (1.710–3.978) |
| Unspecified neuroendocrine tumor | 1031                 | <0.001                | 2.183 (1.774–2.687) | <0.001                  | 1.720 (1.392–2.126) |
| Surgery                          |                      |                       |                     |                         |                     |
| No                               | 1182                 | Reference             | 1                   | Reference               |                     |
| Yes                              | 232                  | <0.001                | 0.231 (0.176–0.305) | <0.001                  | 0.319 (0.239–0.427) |
| Unknown                          | 13                   | 0.139                 | 0.545 (0.244–1.217) | 0.602                   | 0.807 (0.360–1.807) |
| Radiotherapy                     |                      |                       |                     |                         |                     |
| No                               | 1331                 | Reference             | 1                   |                         |                     |
| Yes                              | 96                   | 0.471                 | 1.105 (0.842–1.450) |                         |                     |
| Chemotherapy                     |                      |                       |                     |                         |                     |
| No                               | 682                  | Reference             | 1                   |                         |                     |
| Yes                              | 745                  | 0.518                 | 1.047 (0.911–1.203) |                         |                     |
| Bone metastasis                  |                      |                       |                     |                         |                     |
| No                               | 1310                 | Reference             | 1                   | Reference               | 1                   |
| Yes                              | 117                  | <0.001                | 1.690 (1.346–2.122) | 0.018                   | 1.329 (1.050–1.683) |
| Brain metastasis                 |                      |                       |                     |                         |                     |
| No                               | 1418                 | Reference             | 1                   | Reference               | 1                   |
| Yes                              | 9                    | <0.001                | 4.141 (2.057–8.338) | 0.111                   | 1.817 (0.872–3.785) |
| Lung metastasis                  |                      |                       |                     |                         |                     |
| No                               | 1315                 | Reference             | 1                   | Reference               | 1                   |
| Yes                              | 112                  | <0.001                | 2.661 (2.124–3.333) | <0.001                  | 1.798 (1.421–2.273) |

**Table S4** Demographic and disease factors in all primary gNEN patients with liver metastasis - univariate and multivariate Cox regression results

| Variables                        | Patients<br>(n=171) | Overall survival      |                     |                         |                     |
|----------------------------------|---------------------|-----------------------|---------------------|-------------------------|---------------------|
|                                  |                     | Univariate<br>P value | HR (95% CI)         | Multivariate<br>P value | HR (95% CI)         |
| Gender                           |                     |                       |                     |                         |                     |
| Female                           | 67                  | Reference             | 1                   |                         |                     |
| Male                             | 104                 | 0.167                 | 1.291 (0.899–1.854) |                         |                     |
| Age, years                       |                     |                       |                     |                         |                     |
| Average, range                   | 64.3, 14–96         | <0.001                | 1.025 (1.012–1.038) | 0.001                   | 1.023 (1.010–1.036) |
| Grade                            |                     |                       |                     |                         |                     |
| Well                             | 27                  | Reference             | 1                   | Reference               | 1                   |
| Moderate                         | 16                  | 0.516                 | 1.369 (0.531–3.534) | 0.407                   | 1.499 (0.576–3.907) |
| Poor or undifferentiated         | 85                  | <0.001                | 4.325 (2.278–8.209) | 0.001                   | 3.354 (1.694–6.642) |
| Unknown                          | 43                  | 0.009                 | 2.487 (1.252–4.938) | 0.089                   | 1.863 (0.909–3.821) |
| Functional type                  |                     |                       |                     |                         |                     |
| Carcinoid tumor                  | 41                  | Reference             | 1                   |                         |                     |
| Non- carcinoid tumor             | 5                   | 0.556                 | 1.442 (0.426–4.880) |                         |                     |
| Unspecified neuroendocrine tumor | 125                 | 0.001                 | 2.230 (1.366–3.641) |                         |                     |
| Surgery                          |                     |                       |                     |                         |                     |
| No                               | 144                 | Reference             | 1                   | Reference               | 1                   |
| Yes                              | 25                  | <0.001                | 0.308 (0.164–0.576) | 0.013                   | 0.419 (0.211–0.832) |
| Unknown                          | 2                   | 0.271                 | 0.330 (0.046–2.372) | 0.196                   | 0.271 (0.037–1.962) |
| Radiotherapy                     |                     |                       |                     |                         |                     |
| No                               | 152                 | Reference             | 1                   |                         |                     |
| Yes                              | 19                  | 0.187                 | 1.419 (0.843–2.387) |                         |                     |
| Chemotherapy                     |                     |                       |                     |                         |                     |
| No                               | 89                  | Reference             | 1                   |                         |                     |
| Yes                              | 82                  | 0.461                 | 0.876 (0.616–1.246) |                         |                     |
| Bone metastasis                  |                     |                       |                     |                         |                     |
| No                               | 153                 | Reference             | 1                   |                         |                     |
| Yes                              | 18                  | 0.453                 | 1.238 (0.709–2.165) |                         |                     |
| Brain metastasis                 |                     |                       |                     |                         |                     |
| No                               | 166                 | Reference             | 1                   |                         |                     |
| Yes                              | 5                   | 0.658                 | 1.253 (0.461–3.402) |                         |                     |
| Lung metastasis                  |                     |                       |                     |                         |                     |
| No                               | 152                 | Reference             | 1                   |                         |                     |
| Yes                              | 19                  | 0.317                 | 1.318 (0.767–2.262) |                         |                     |
